# Supplementary material
Source: publisher figshare collection journal article supplement (https://rs.figshare.com/ndownloader/files/8423495)
Supplement: Supplementary file [file 8423495]

## Definitions of variable names in the dataset for Magid, Sarkol & Mesoudi ‘Experimental priming of independent and interdependent activity does not affect culturally-variable psychological processes’

### A. Experiment 1 dataset: file MagidSarkolMesoudi\_ESM\_FileS1\_exp1data.csv

| <u>Variable name</u>           | <u>Definition</u>                                                                             |
|--------------------------------|-----------------------------------------------------------------------------------------------|
| participant                    | Participant identification number                                                             |
| date                           | Date of experiment                                                                            |
| session                        | Session number                                                                                |
| activity                       | Experimental condition: solitary or collective                                                |
| n                              | Number of participants in session                                                             |
| meancontribution               | Mean contribution in allotted units to the Public Goods Game (collective condition only)      |
| meanpunishgiven                | Mean number of units allocated to punishment in the Public Goods Game (PGG)                   |
| meanpunishreceived             | Mean number of units deducted due to punishment by others in the PGG                          |
| pggearnings                    | Amount of money earned in the PGG                                                             |
| pggearnrank                    | Ranking of all participants according to pggearnings                                          |
| pggearnrelativerank            | The variable pggearnrank scaled from 0-1                                                      |
| pggpunishmentgivenrank         | Ranking of all participants according to meanpunishgiven                                      |
| pggpunishmentgivenrelativerank | The variable pggpunishmentgivenrank scaled from 0-1                                           |
| pggpunishreceivedrank          | Ranking of participants according to meanpunishreceived                                       |
| pggpunishreceivedrelativerank  | The variable pggpunishreceivedrank scaled from 0-1                                            |
| rightchoice                    | Mean number of correct choices in the Multi-Armed Bandit (MAB) game (solitary condition only) |
| rightchoicerank                | Ranking according to number of correct choices                                                |
| rightchoicerelativerank        | The variable rightchoicerank scaled from 0-1                                                  |
| sortgoodnessofparticipant      | Mean success in either the PGG or MAB game, scaled 0-1                                        |
| goodnessofparticipant          | Ranking according to sortgoodnessofparticipant                                                |
| beholcategorisation            | Before the prime, number of holistic choices in the categorisation task                       |
| afholcategorisation            | After the prime, number of holistic choices in the categorisation task                        |
| bepictures                     | Before the prime, mean number of holistic portrait choices                                    |

|                                       |                                                                                                                                          |
|---------------------------------------|------------------------------------------------------------------------------------------------------------------------------------------|
| afpictures                            | After the prime, mean number of holistic portrait choices                                                                                |
| besingpronouns                        | Before the prime, number of independent pronouns generated                                                                               |
| afsingpronouns                        | After the prime, number of independent pronouns generated                                                                                |
| beplurpronouns                        | Before the prime, number of interdependent pronouns generated                                                                            |
| afplurpronouns                        | After the prime, number of interdependent pronouns generated                                                                             |
| beplursingpronouns                    | Ratio of besingpronouns and beplurpronouns before the prime                                                                              |
| afplursingpronouns                    | Ratio of besingpronouns and beplurpronouns after the prime                                                                               |
| behorizon                             | Before the prime, horizon height in the landscape drawing task scaled 0-1                                                                |
| afhorizon                             | After the prime, horizon height in the landscape drawing task scaled 0-1                                                                 |
| beadditms                             | Before the prime, the number of additional items in the landscape drawing task                                                           |
| afadditms                             | After the prime, the number of additional items in the landscape drawing task                                                            |
| beindvalues                           | Mean score on the independent / individualism items of the questionnaire before the prime                                                |
| afindvalues                           | Mean score on the independent / individualism items of the questionnaire after the prime                                                 |
| becolvalues                           | Mean score on the interdependent / collectivism items of the questionnaire before the prime                                              |
| afcolvalues                           | Mean score on the interdependent / collectivism items of the questionnaire after the prime                                               |
| age                                   | Age of participant                                                                                                                       |
| sex                                   | Gender of the participant                                                                                                                |
| study                                 | Study subject of the student participant                                                                                                 |
| year                                  | Study year of the undergraduate participants, or years in university education for postgraduates                                         |
| familiaritywithgroup                  | Whether participants were familiar with their fellow group members before the experiment                                                 |
| country.born                          | Country in which participant was born                                                                                                    |
| moveukage                             | If not born in the UK, age at which participant moved to the UK                                                                          |
| parent1m.country.born                 | Father's country of birth                                                                                                                |
| parent2f.country.born                 | Mother's country of birth                                                                                                                |
| grandparentsborn1 - grandparentsborn4 | Country in which grandparents were born                                                                                                  |
| region.born                           | Region in which participant was born: UK/Ire, Europe (non-UK), SE Asia, Africa, N Africa / Mid-east, Russia/C Asia, S America/Carribbean |
| pt.1_categ                            | Proportionate variable of pre-prime categorical responses (0=no ind, 1=all ind, .5=evenly ind and int.)                                  |
| pt.2_categ                            | Proportionate variable of post-prime categorical responses (0=no ind, 1=all ind, .5=evenly ind and int.)                                 |

|                    |                                                                                                                                             |
|--------------------|---------------------------------------------------------------------------------------------------------------------------------------------|
| pt.1_picsize       | Pre-prime mean photo portrait face choice size                                                                                              |
| pt.2_picsize       | Post-prime mean photo portrait face choice size                                                                                             |
| pron.ind_pt.1      | Pre-prime summed number of singular "ind" pronouns used                                                                                     |
| pron.ind_pt.2      | Post-prime summed number of singular "ind" pronouns used                                                                                    |
| pron.int_pt.1      | Pre-prime summed number of plural "int" pronouns used                                                                                       |
| pron.int_pt.2      | Post-prime summed number of plural "int" pronouns used                                                                                      |
| rat_pron_pt.1      | Pre-prime ratio of singular "ind"/total number of pronouns used                                                                             |
| rat_pron_pt.2      | Post-prime ratio of singular "ind"/total number of pronouns used                                                                            |
| selfcon.ind_time.1 | Pre-prime mean independent self-construal response, 0="strongly agree"; 9.5="strongly disagree"                                             |
| selfcon.ind_time.2 | Post-prime mean independent self-construal response, 0="strongly agree"; 9.5="strongly disagree"                                            |
| selfcon.int_time.1 | Pre-prime mean interdependent self-construal response, 0=most interdependent "strongly agree"; 9.5=least interdependent"strongly disagree"  |
| selfcon.int_time.2 | Post-prime mean interdependent self-construal response, 0=most interdependent "strongly agree"; 9.5=least interdependent"strongly disagree" |
| hor_time.1         | Pre-prime ratio of horizon height/box height                                                                                                |
| hor_time.2         | Post-prime ratio of horizon height/box height                                                                                               |
| addo_time.1        | Pre-prime total number of additional objects                                                                                                |
| addo_time.2        | Post-prime total number of additional objects                                                                                               |
| payout             | Payout in pounds to participant                                                                                                             |
| region_born.red    | Reduced region born categories: "UK/Ire", "Other", "Europe (non-UK)", "S Asia", "SE Asia"                                                   |

## B. Experiment 2 dataset: file MagidSarkolMesoudi\_ESM\_FileS2\_exp2data.csv

| <u>Variable name</u>                                                                | <u>Definition</u>                                                                                                 |
|-------------------------------------------------------------------------------------|-------------------------------------------------------------------------------------------------------------------|
| date                                                                                | Date of experiment                                                                                                |
| session                                                                             | Session number                                                                                                    |
| condition                                                                           | Experimental condition: A (solitary absolute); B (solitary relative); C (collective absolute); D (group relative) |
| n                                                                                   | Number of participants in session                                                                                 |
| participant                                                                         | Team or participant designation                                                                                   |
| score_r1-score_r3                                                                   | Number of points earned for task performance each round                                                           |
| score_total                                                                         | Total score in points earned for task performance                                                                 |
| payout                                                                              | Total amount paid to participant in £GBP, (£5.00 honorarium + performance bonus)                                  |
| rank                                                                                | Relative conditions only, rank out of all participants (solitary) or teams (collective)                           |
| version                                                                             | Questionnaire version used                                                                                        |
| pt.1_categ_q1-<br>pt.1_categ_q10;<br>pt.2_categ_q1-<br>pt.2_categ_q10               | Categorical response: Analytical rule="Ind", Holistic rule="int"                                                  |
| pt.1_categ_r1-<br>pt.1_categ_r10;<br>pt.2_categ_r1-<br>pt.2_categ_r10;              | Reason given (if any) for choice of categorisation response                                                       |
| pt.1_sec2_pic1-<br>pt.1_sec2_pic5;<br>pt.2_sec2_pic1-<br>pt.2_sec2_pic5             | Photo portrait choice response of 1-4 photos                                                                      |
| pt.1_sec3_s1_sing-<br>pt.1_sec3_s5_sing;<br>pt.2_sec3_s1_sing-<br>pt.2_sec3_s5_sing | Number of singular (independent) pronouns used per sentence 1-5                                                   |
| pt.1_sec3_s1_plur-<br>pt.1_sec3_s5_plur;<br>pt.2_sec3_s1_plur-<br>pt.2_sec3_s5_plur | Number of plural (interdependent) pronouns used per sentence 1-5                                                  |

|                                                                  |                                                                                                                                                                                                             |
|------------------------------------------------------------------|-------------------------------------------------------------------------------------------------------------------------------------------------------------------------------------------------------------|
| pt.1_sec4_q1-<br>pt.1_sec4_q8;<br>pt.2_sec4_q1-<br>pt.2_sec4_q8; | Distance (cm) of participant's mark on a line from left "strongly agree"=0.0 to right "strongly disagree"=9.5                                                                                               |
| pt.1_sec5_horizon_height                                         | Height (cm) of average horizon meeting point on left and right margins, from bottom of the drawing                                                                                                          |
| pt.1_sec5_boxheight                                              | Total height (cm) of box for drawing task                                                                                                                                                                   |
| pt.1_sec5_additional_items                                       | total count of objects in drawing added outside of requested five objects                                                                                                                                   |
| age                                                              | Age in years                                                                                                                                                                                                |
| sex                                                              | Sex "Male" or "Female"                                                                                                                                                                                      |
| country.born                                                     | Response to "In which country were you born?"                                                                                                                                                               |
| parent1m.country.born                                            | Response to "In which country (or countries) were your parents born?" Mother:                                                                                                                               |
| parent2f.country.born                                            | Response to "In which country (or countries) were your parents born?" Father:                                                                                                                               |
| other.countries1-<br>other.countries3;<br>age_moved1-age_moved3  | Response to "If you have lived in more than one country in your lifetime, please list those countries and give the age you were when you moved to each country" (Free response to fill as many as required) |
| occupation                                                       | Response to "What is your current occupation (If you are retired, please give your most recent occupation at the time of retirement)"                                                                       |
| mother_occupation                                                | Response to "What are your parents' current or (if retired) most recent occupations?" Mother:                                                                                                               |
| father_occupation                                                | Response to "What are your parents' current or (if retired) most recent occupations?" Father:                                                                                                               |
| participant                                                      | Participant id number                                                                                                                                                                                       |
| activity                                                         | Solitary vs. collective condition                                                                                                                                                                           |
| payoffs                                                          | Relative vs. absolute payout condition                                                                                                                                                                      |
| gender                                                           | Including case of "non-binary"                                                                                                                                                                              |
| region_born                                                      | Participant country born categorised by regions: "UK/Ire", "Africa", "Europe (non-UK)", "N Africa/Mid-East", "N America", "Russia/C Asia", "S America/Caribbean", "S Asia", "SE Asia"                       |
| mother_region_born                                               | Participant's mother's country born categorised by regions: "UK/Ire", "Africa", "Europe (non-UK)", "N Africa/Mid-East", "N America", "Russia/C Asia", "S America/Caribbean", "S Asia", "SE Asia"            |
| father_region_born                                               | Participant's father's country born categorised by regions: "UK/Ire", "Africa", "Europe (non-UK)", "N Africa/Mid-East", "N America", "Russia/C Asia", "S America/Caribbean", "S Asia", "SE Asia"            |
| pt.1_int_categorisation                                          | Pre-prime summed number of categorical responses: Holistic rule="int"                                                                                                                                       |
| pt.1_ind_categorisation                                          | Pre-prime summed number of categorical responses: Analytic rule="ind"                                                                                                                                       |
| pt.2_int_categorisation                                          | Post-prime summed number of categorical responses: Holistic rule="int"                                                                                                                                      |

|                         |                                                                                                                                                                                                                                   |
|-------------------------|-----------------------------------------------------------------------------------------------------------------------------------------------------------------------------------------------------------------------------------|
| pt.2_ind_categorisation | Post-prime summed number of categorical responses: Analytic rule="ind"                                                                                                                                                            |
| chg_categ.int           | Change in number of holistic "int" responses following prime                                                                                                                                                                      |
| chg_categ.ind           | Change in number of analytic "ind" responses following prime                                                                                                                                                                      |
| pt.1_categ              | Proportionate variable of pre-prime categorical responses (0=no ind, 1=all ind, .5=evenly ind and int.); calculation: $\text{pt.1\_ind\_categorisation} / (\text{pt.1\_ind\_categorisation} + \text{pt.1\_int\_categorisation})$  |
| pt.2_categ              | Proportionate variable of post-prime categorical responses (0=no ind, 1=all ind, .5=evenly ind and int.); calculation: $\text{pt.2\_ind\_categorisation} / (\text{pt.2\_ind\_categorisation} + \text{pt.2\_int\_categorisation})$ |
| chg_categ               | Change in proportion of categorical ind/int responses following prime                                                                                                                                                             |
| pt.1_picnum1            | Numeric variables of photo portrait face choice size on 4 point scale with 1=smallest face (highest int) to 4=largest (highest ind)                                                                                               |
| pt.1_picsize            | Pre-prime mean photo portrait face choice size                                                                                                                                                                                    |
| pt.2_picsize            | Post-prime mean photo portrait face choice size                                                                                                                                                                                   |
| chg_pic                 | Change in mean photo portrait face choice size following prime                                                                                                                                                                    |
| pron.ind_pt.1           | Pre-prime summed number of singular "ind" pronouns used                                                                                                                                                                           |
| pron.ind_pt.2           | Post-prime summed number of singular "ind" pronouns used                                                                                                                                                                          |
| pron.int_pt.1           | Pre-prime summed number of plural "int" pronouns used                                                                                                                                                                             |
| pron.int_pt.2           | Post-prime summed number of plural "int" pronouns used                                                                                                                                                                            |
| chg_pron.ind            | Change in total number of singular "ind" pronouns used following prime                                                                                                                                                            |
| chg_pron.int            | Change in total number of plural "int" pronouns used following prime                                                                                                                                                              |
| rat_pron_pt.1           | Pre-prime ratio of singular "ind"/total number of pronouns used                                                                                                                                                                   |
| rat_pron_pt.2           | Post-prime ratio of singular "ind"/total number of pronouns used                                                                                                                                                                  |
| chg_rat_pron            | Change in ratio of singular "ind" to total pronouns used following prime                                                                                                                                                          |
| selfcon.ind_time.1      | Pre-prime mean independent self-construal response, 0="strongly agree"; 9.5="strongly disagree"                                                                                                                                   |
| selfcon.ind_time.2      | Post-prime mean independent self-construal response, 0="strongly agree"; 9.5="strongly disagree"                                                                                                                                  |
| selfcon.int_time.1      | Pre-prime mean interdependent self-construal response, 0=most interdependent "strongly agree"; 9.5=least interdependent "strongly disagree"                                                                                       |
| selfcon.int_time.2      | Post-prime mean interdependent self-construal response, 0=most interdependent "strongly agree"; 9.5=least interdependent "strongly disagree"                                                                                      |
| chg_selfcon.ind         | Change in mean independent self-construal rating following prime                                                                                                                                                                  |
| chg_selfcon.int         | Change in mean interdependent self-construal rating following prime                                                                                                                                                               |
| rat_selfcon.ind_time.1  | Pre-prime ratio of independent/(interdependent + independent) self construal ratings                                                                                                                                              |

|                        |                                                                                                                                  |
|------------------------|----------------------------------------------------------------------------------------------------------------------------------|
| rat_selfcon.ind_time.2 | Post-prime ratio of independent/(interdependent + independent) self construal ratings                                            |
| chg_rat_selfcon.ind    | Change in ratio of independent/(interdependent + independent) self construal ratings following prime                             |
| selfcon.ver_time.1     | Pre-prime mean vertical self-construal response, 0="strongly agree"; 9.5="strongly disagree"                                     |
| selfcon.ver_time.2     | Post-prime mean vertical self-construal response, 0="strongly agree"; 9.5="strongly disagree"                                    |
| selfcon.hor_time.1     | Pre-prime mean horizontal self-construal response, 0=most horizontal "strongly agree"; 9.5=least horizontal "strongly disagree"  |
| selfcon.hor_time.2     | Post-prime mean horizontal self-construal response, 0=most horizontal "strongly agree"; 9.5=least horizontal "strongly disagree" |
| chg_selfcon.ver        | Change in mean vertical self-construal rating following prime                                                                    |
| chg_selfcon.hor        | Change in mean horizontal self-construal rating following prime                                                                  |
| rat_selfcon.hor_time.1 | Pre-prime ratio of horizontal/(vertical + horizontal) self construal ratings                                                     |
| rat_selfcon.hor_time.2 | Post-prime ratio of horizontal/(vertical + horizontal) self construal ratings                                                    |
| chg_rat_selfcon.hor    | Change in ratio of horizontal/(vertical + horizontal) self construal ratings following prime                                     |
| hor_time.1             | Pre-prime ratio of horizon height/box height                                                                                     |
| hor_time.2             | Post-prime ratio of horizon height/box height                                                                                    |
| chg_hor                | Change in ratio of horizon height/box height following prime                                                                     |
| addo_time.1            | Pre-prime total number of additional objects                                                                                     |
| addo_time.2            | Post-prime total number of additional objects                                                                                    |
| chg_addo               | Change in number of additional objects following the prime                                                                       |
| region_born.red        | Reduced region born categories: "UK/Ire", "Other", "Europe (non-UK)", "S Asia", "SE Asia"                                        |
